# Supplementary material for: Effects of solvent on the relative stability of mono and di-aluminium aryloxide complexes of bipyridines: anomalous behavior of [(tBu)2Al(OPh)]2(μ-4,4-bipy)
Source: Royal Society of Chemistry journal article supplement (doi:10.1039/b501044f), 2005-01-01
Supplement: b501044f.pdf [file b501044f.pdf]

**Effects of Solvent on the Relative Stability of Mono and Di-Aluminum Aryloxy Complexes of Bipyridines: Anomalous Behavior of  $[(t\text{Bu})_2\text{Al}(\text{OPh})]_2(\mu\text{-4,4-bipy})$**

Doug Ogrin, Laura H. van Poppel, and Andrew R. Barron\*

*Department of Chemistry and Center for Nanoscale Science and Technology,  
Rice University, Houston, Texas 77005, USA*

Supplementary Materials

**Table S1.** Calculated total energies.

| Compound                                                                           | Energy (Hartrees) |
|------------------------------------------------------------------------------------|-------------------|
| CHCl <sub>3</sub>                                                                  | -1410.41060535    |
| pyridine                                                                           | -245.31200369     |
| 4,4'-bipy                                                                          | -489.473944986    |
| bipetha                                                                            | -567.113876406    |
| bipethe                                                                            | -565.930166393    |
| AlMe <sub>2</sub> (OPh)                                                            | -622.83285442     |
| [Me <sub>2</sub> Al(μ-OPh)] <sub>2</sub>                                           | -1245.77424247    |
| AlMe <sub>2</sub> (OPh)(py)                                                        | -868.20463933     |
| Al( <sup>t</sup> Bu) <sub>2</sub> (OPh)                                            | -855.72752456     |
| [( <sup>t</sup> Bu) <sub>2</sub> Al(μ-OPh)] <sub>2</sub>                           | -1711.55316024    |
| Al( <sup>t</sup> Bu) <sub>2</sub> (OPh)(py)                                        | -1101.10129786    |
| [( <sup>t</sup> Bu) <sub>2</sub> Al(OPh)] <sub>2</sub> (μ-4,4'-bipy) ( <b>1a</b> ) | -2201.04687698    |
| [( <sup>t</sup> Bu) <sub>2</sub> Al(OPh)] <sub>2</sub> (μ-bipetha) ( <b>2a</b> )   | -2278.69234995    |
| [( <sup>t</sup> Bu) <sub>2</sub> Al(OPh)] <sub>2</sub> (μ-bipethe) ( <b>3a</b> )   | -2277.50650599    |
| Al( <sup>t</sup> Bu) <sub>2</sub> (OPh)(4,4'-bipy) ( <b>1b</b> )                   | -1345.26215724    |
| Al( <sup>t</sup> Bu) <sub>2</sub> (OPh)(bipetha) ( <b>2b</b> )                     | -1422.90403996    |
| Al( <sup>t</sup> Bu) <sub>2</sub> (OPh)(bipethe) ( <b>3b</b> )                     | -1421.71957521    |
| 4,4'-bipy...CHCl <sub>3</sub>                                                      | -1899.89756967    |
| bipetha...CHCl <sub>3</sub>                                                        | -1977.53813565    |
| bipethe...CHCl <sub>3</sub>                                                        | -1976.35409430    |
| Al( <sup>t</sup> Bu) <sub>2</sub> (OPh)(4,4'-bipy)...CHCl <sub>3</sub>             | -2755.68446265    |
| Al( <sup>t</sup> Bu) <sub>2</sub> (OPh)(bipetha)...CHCl <sub>3</sub>               | -2833.32755301    |
| Al( <sup>t</sup> Bu) <sub>2</sub> (OPh)(bipethe)...CHCl <sub>3</sub>               | -2832.14250987    |
